# Supplementary material for: Anti-dengue fever activity of a polyherbal extract from medicinal plants of Vietnam
Source: publisher site journal article supplement (doi:10.1515/znc-2025-0197), 2025-12-11
Supplement: Supplementary file 1 [file j_znc-2025-0197_suppl_001.docx]

**Supplementary data**

**Anti-Dengue fever activity of a mixed extract from**

**medicinal plants of Vietnam**

Vo Hoai Bac1, Le Thi Xoan2, Nguyen Thi Thu Thuy3, Vu Thi Bich Hau3, Hayeong Kim4, Dong Van Quyen1,Doman Kim4,5, Nguyen Thi Phuong Trang6, Nguyen Van Tam7, Nguyen Van Dung7, Nguyen Thi Mai Phuong1*

*1Institute of Biology, Vietnam Academy of Science and Technology, 18 Hoang Quoc Viet Road, Cau Giay, Hanoi, Vietnam.*

*2National Institute of Medicinal Materials, 3B Quang Trung Street, Hoan Kiem, Hanoi, Vietnam*

*3National Institute of Hygiene And Epidemiology, 1 Yecxanh, Hai Ba Trung, Hanoi, Vietnam.*

*4Institute of Food Industrialization, Institutes of Green Bio Science and Technology, Seoul National University, Pyeongchang-gun, Gangwon-do, 25354, Republic of Korea.*

*5Graduate School of International Agricultural Technology, Seoul National University, Pyeongchang-gun, Gangwon-do, 25354, Republic of Korea.*

*6Vietnam-Korea Institute of Science and Technology (VKIST), Hoa lac High-tech Park, km29 Thang Long Boulevard, Hanoi.*

*7VPO PHARCO Company, 688 Nguyen Thi Minh Khai Road*, Vinh Yen*, Phu Tho, Vietnam*

**- Apigenin: (RT=20.69)**


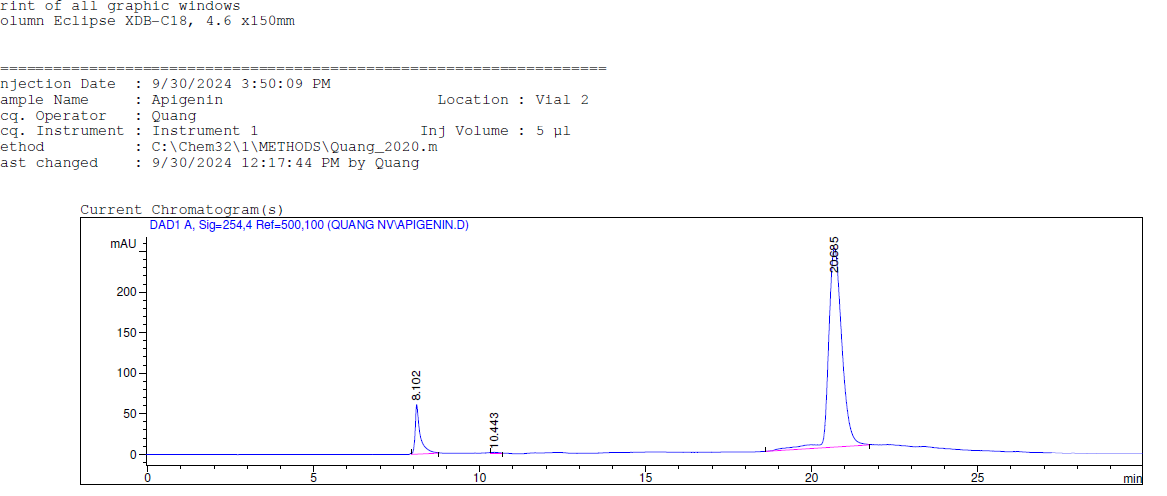


**Fig 1A****. HPLC HPLC chromatogram of Apigenin**

- **Caffeic acid: (RT=15.68)**

**
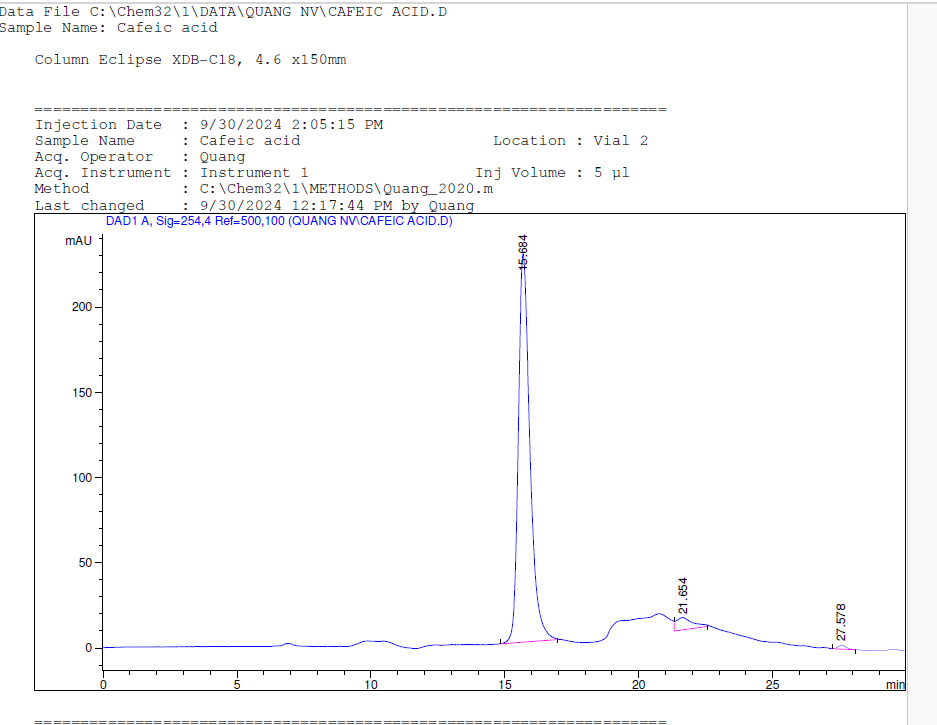
**

**Fig 1B. HPLC chromatogram of** **Caffeic acid**

- **Luteolin: (RT=18.67)**


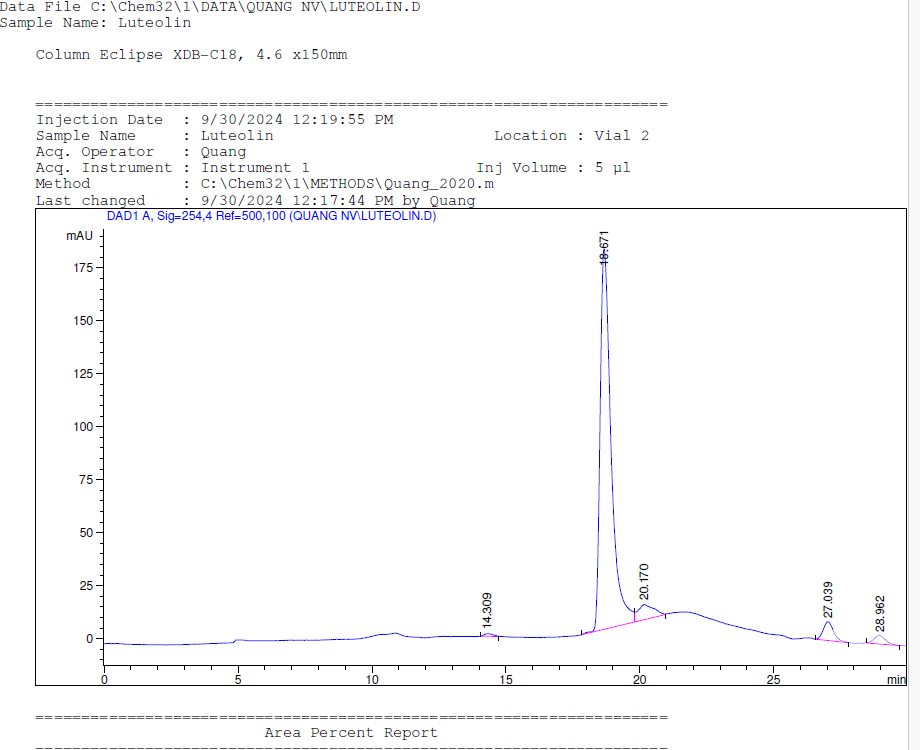


**Fig 1C. HPLC chromatogram of** **Luteolin**

- **Quecertin: (RT=19.69)**

**
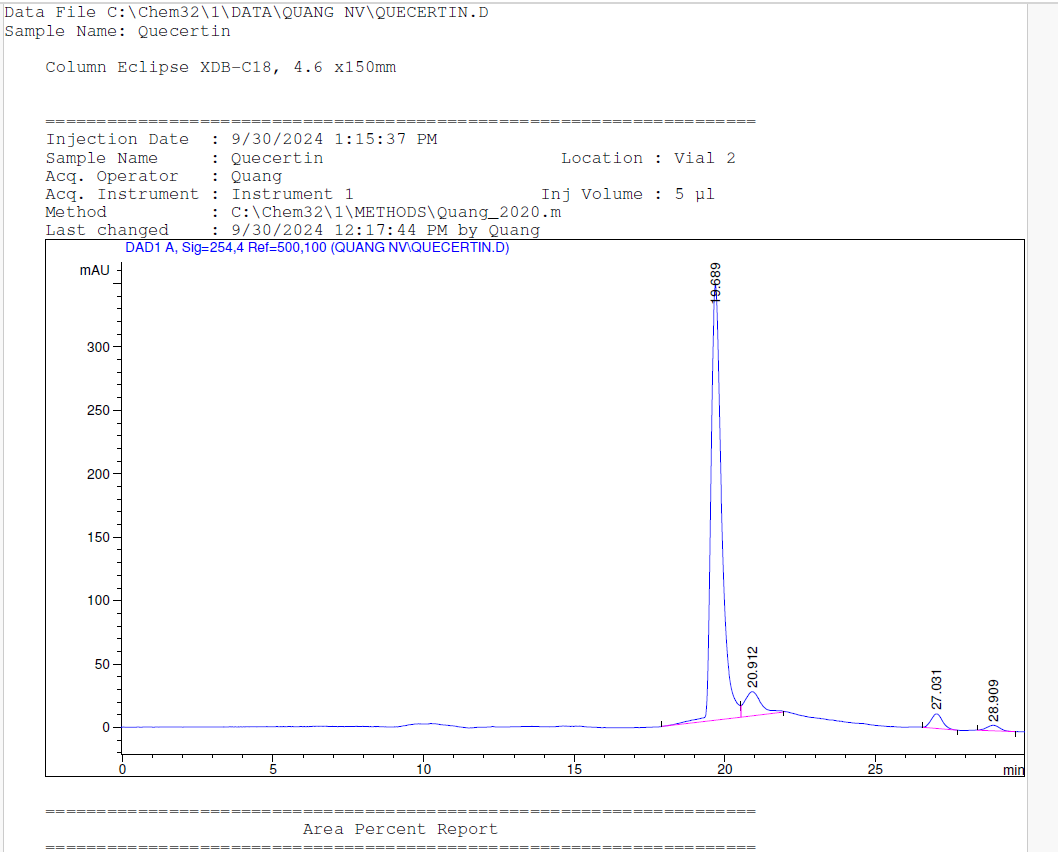
**

**Fig 1D. HPLC chromatogram of** **Quecertin**

**- Astilbin: RT= 8.16**

**-**
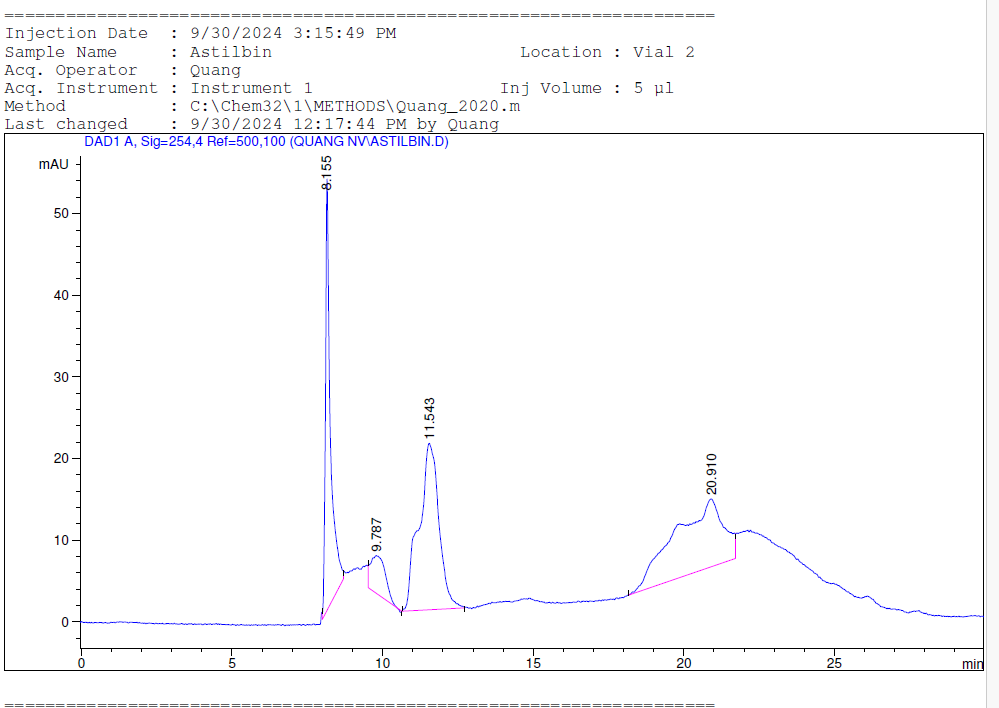


**Fig 1E. HPLC chromatogram of** **Astilbin**

**Table 1. Concentration (mg/mL) of Hemoshield (HE) on cell plate testing activity against DENV-1, DENV-2, DENV-3, DENV-4.** Ethanol 25% extract of Hemoshield (**EE**); Aqueous (water) extract of Hemoshield (**WE**). **DENV** = dengue virus

**DENV-1**


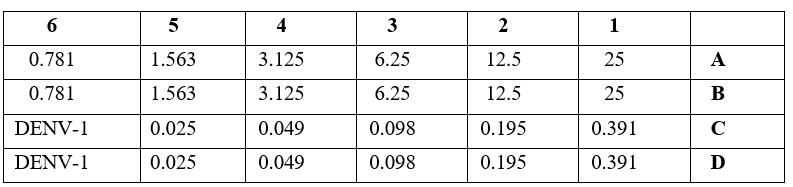


**EE**


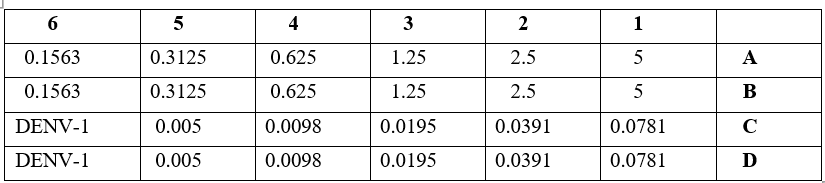


**WE**

**DENV-2**


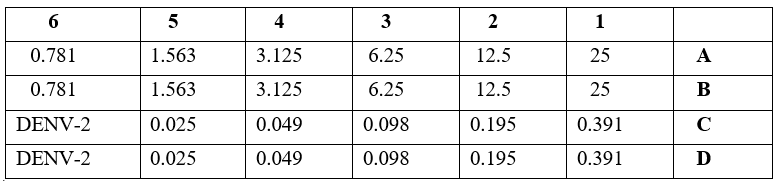


**EE**


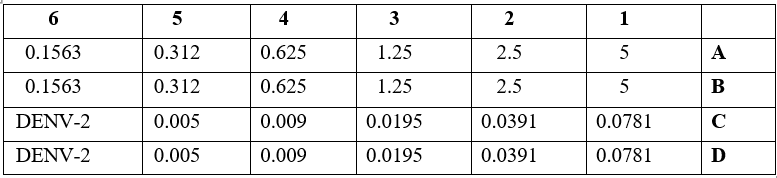


**WE**

**DENV-3**


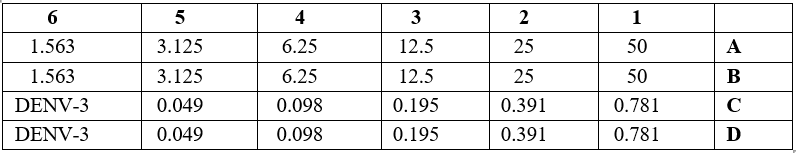


**EE**


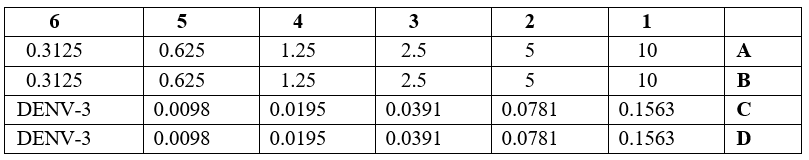


**WE**

**DENV-4**


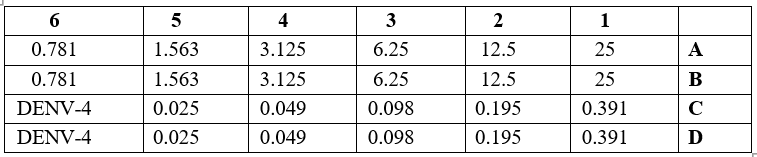


**EE**


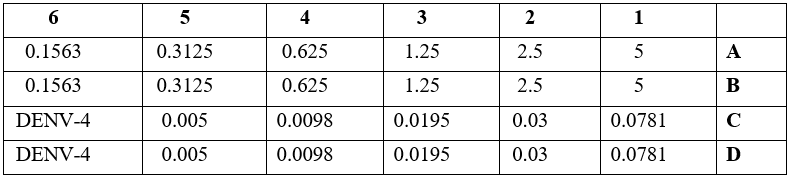


**WE**
